# Supplementary figures and images for: Iron Fortification of Lentil (Lens culinaris Medik.) to Address Iron Deficiency
Source: MDPI journal article supplement (doi:10.3390/nu9080863), 2017-08-11

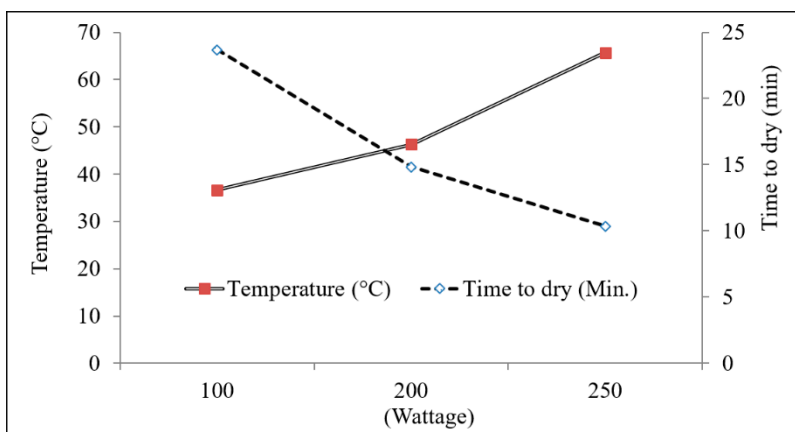

Supplementary Figure S1

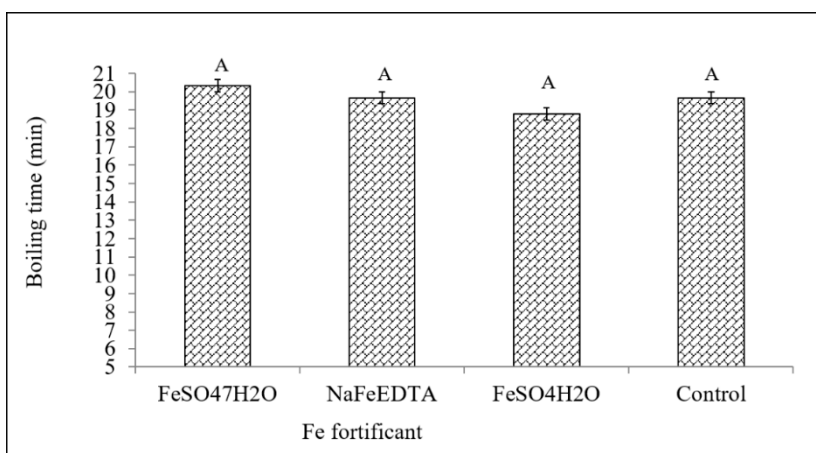

Supplementary Figure S2

Supplement: s1 [file s1]
